# Supplementary material for: Genomic Access to Monarch Migration Using TALEN and CRISPR/Cas9-Mediated Targeted Mutagenesis
Source: Oxford University Press journal article supplement (doi:10.1534/g3.116.027029), 2016-03-08
Supplement: 027029_figures2.pdf [file 027029_figures2.pdf]

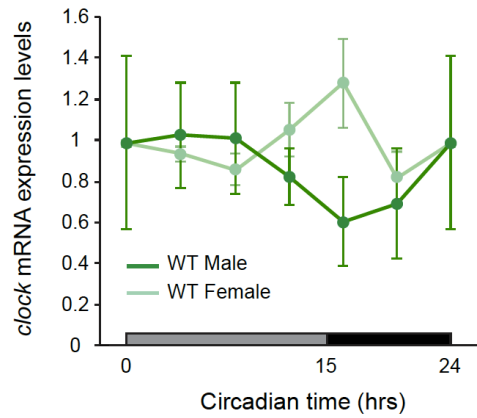

**Figure S2. Circadian expression of *clock* in brains of wild-type monarchs.**

Expression levels in brains of females (light green) and males (dark green) entrained to light:dark cycles, and collected the first day of transfer in constant darkness. Values are mean  $\pm$  SEM of three animals. Box shading: gray, subjective day; black, subjective night.

Effect of sex, two-way ANOVA:  $p=0.20$ .
