# Supplementary material for: Genomic Access to Monarch Migration Using TALEN and CRISPR/Cas9-Mediated Targeted Mutagenesis
Source: Oxford University Press journal article supplement (doi:10.1534/g3.116.027029), 2016-03-08
Supplement: 027029_tables1.pdf [file 027029_tables1.pdf]

**Table S1.** Primer sequences.

| <i>Clock</i> and <i>cry2</i> primers |                          |
|--------------------------------------|--------------------------|
| <i>clock</i> F1                      | GGAGAGACCAGTTCAACATGC    |
| <i>clock</i> F2                      | GATGGGAATAAAGATACGGGTCAC |
| <i>clock</i> R1                      | CGGAGTATGCCCTAGCAAAG     |
| <i>clock</i> R2                      | CCAAGGCCTCCAAGACTAAGTA   |
| <i>cry2</i> F1                       | ATTCCCGTTTATTCGTGGTG     |
| <i>cry2</i> F2                       | GAGAGAGGGGCTCGTTGATG     |
| <i>cry2</i> R1                       | TCGAGTGTCGGCACTCCAATC    |
| <i>cry2</i> R2                       | CTGGCGTCATCTTCGGTCTT     |
