# Supplementary material for: Genomic Access to Monarch Migration Using TALEN and CRISPR/Cas9-Mediated Targeted Mutagenesis
Source: G3 (Bethesda). 2016 Feb 1;6(4):905–15. doi: 10.1534/g3.116.027029 (PMC4825660; doi:10.1534/g3.116.027029)
Supplement: Supporting Materials [file supp_g3.116.027029_FigureS3.pdf]

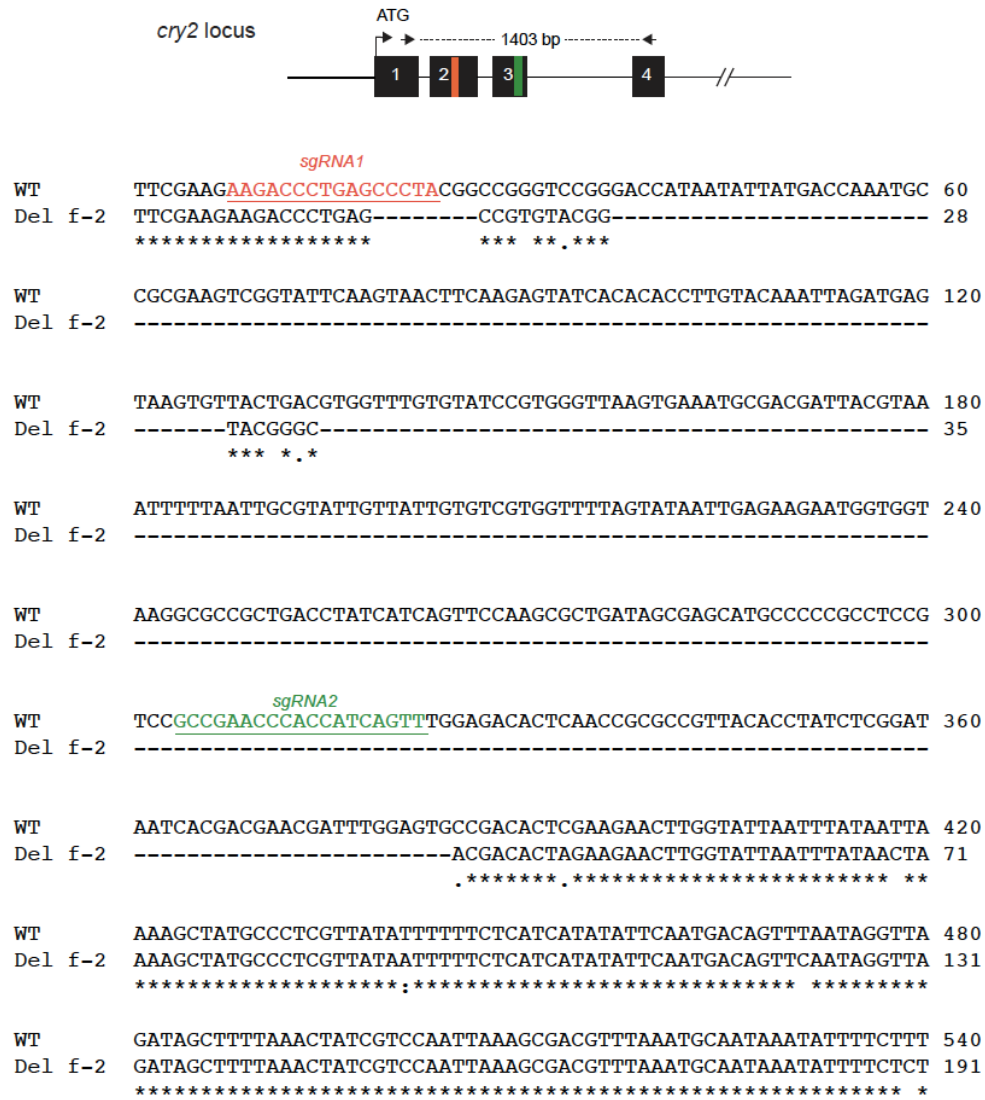

**Figure S3. Sequence of the genomic deletion generated using two sgRNAs at the *cry2* locus.** The position of the two sgRNA in exons 2 and 3 is shown on the schematic of the locus. Wild-type and mutated sequences are aligned to show the nature of the deletion.
